# Supplementary material
Source: Research Square preprint supplement (doi:10.21203/rs.3.rs-9163384/v1)
Supplement: Supplementary file 1 [file bb69e01d062836095645a423.docx]

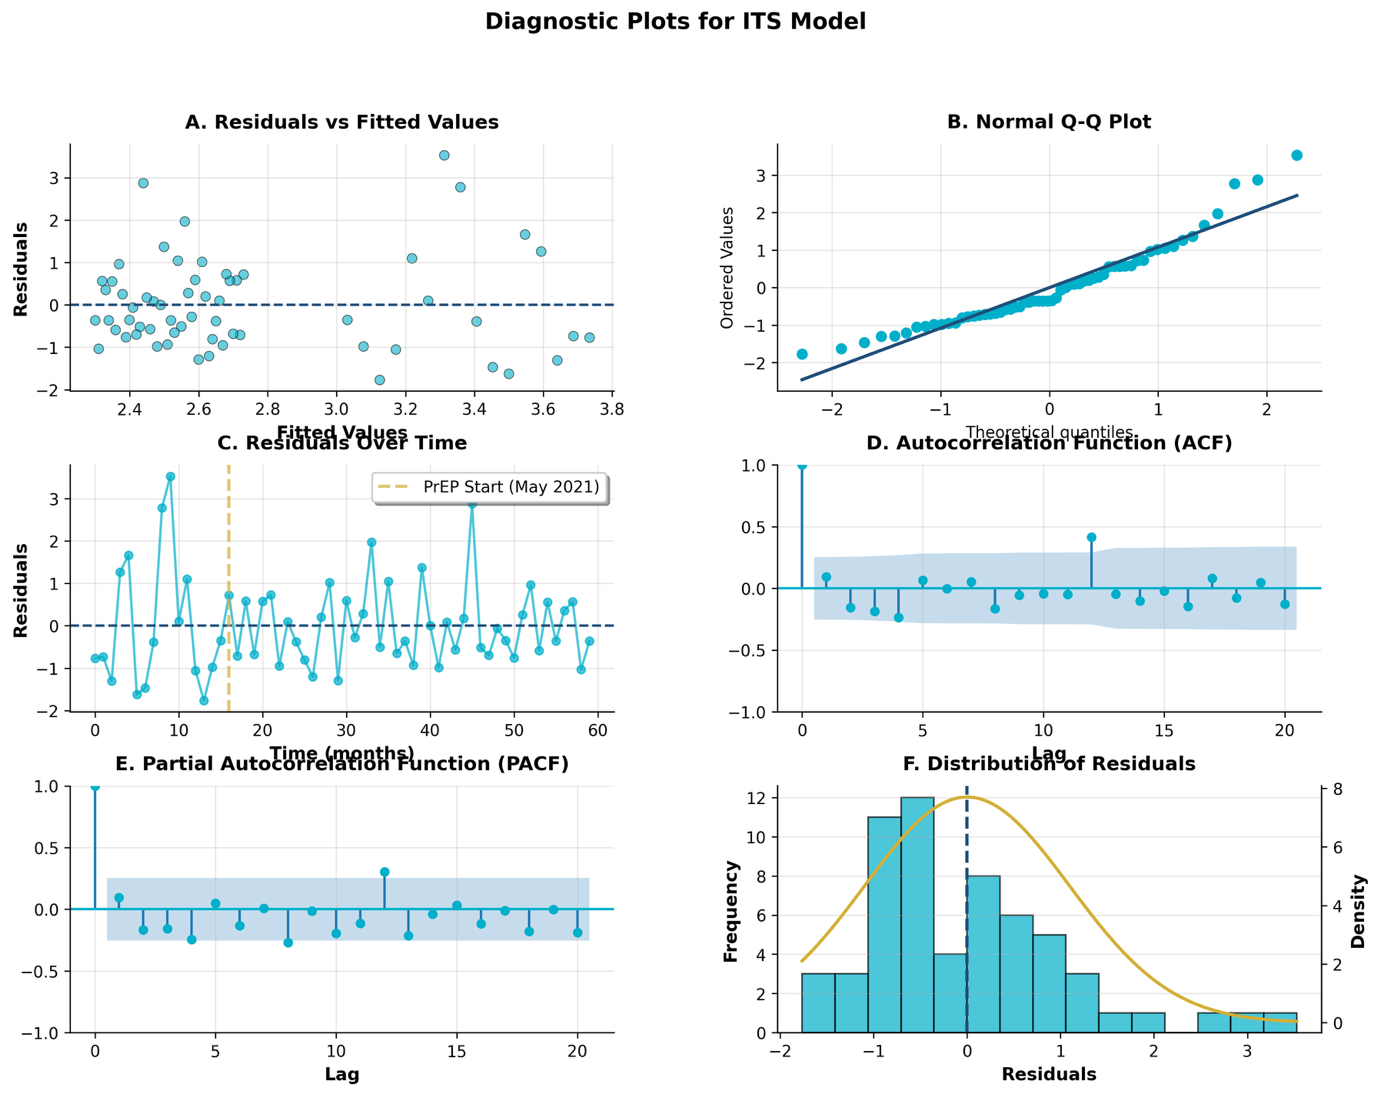


**Fig. S1.** Diagnostic plots for ITS model validity. *Note:* (A) Residuals vs fitted values showing random scatter without systematic patterns. (B) Normal Q-Q plot indicating acceptable normality with minor tail deviations. (C) Residuals over time showing no temporal trends; vertical line marks PrEP initiation (May 2021). (D) Autocorrelation function with all lags within 95% confidence bounds. (E) Partial autocorrelation function confirming no significant serial correlation. (F) Histogram of residuals approximating normal distribution.


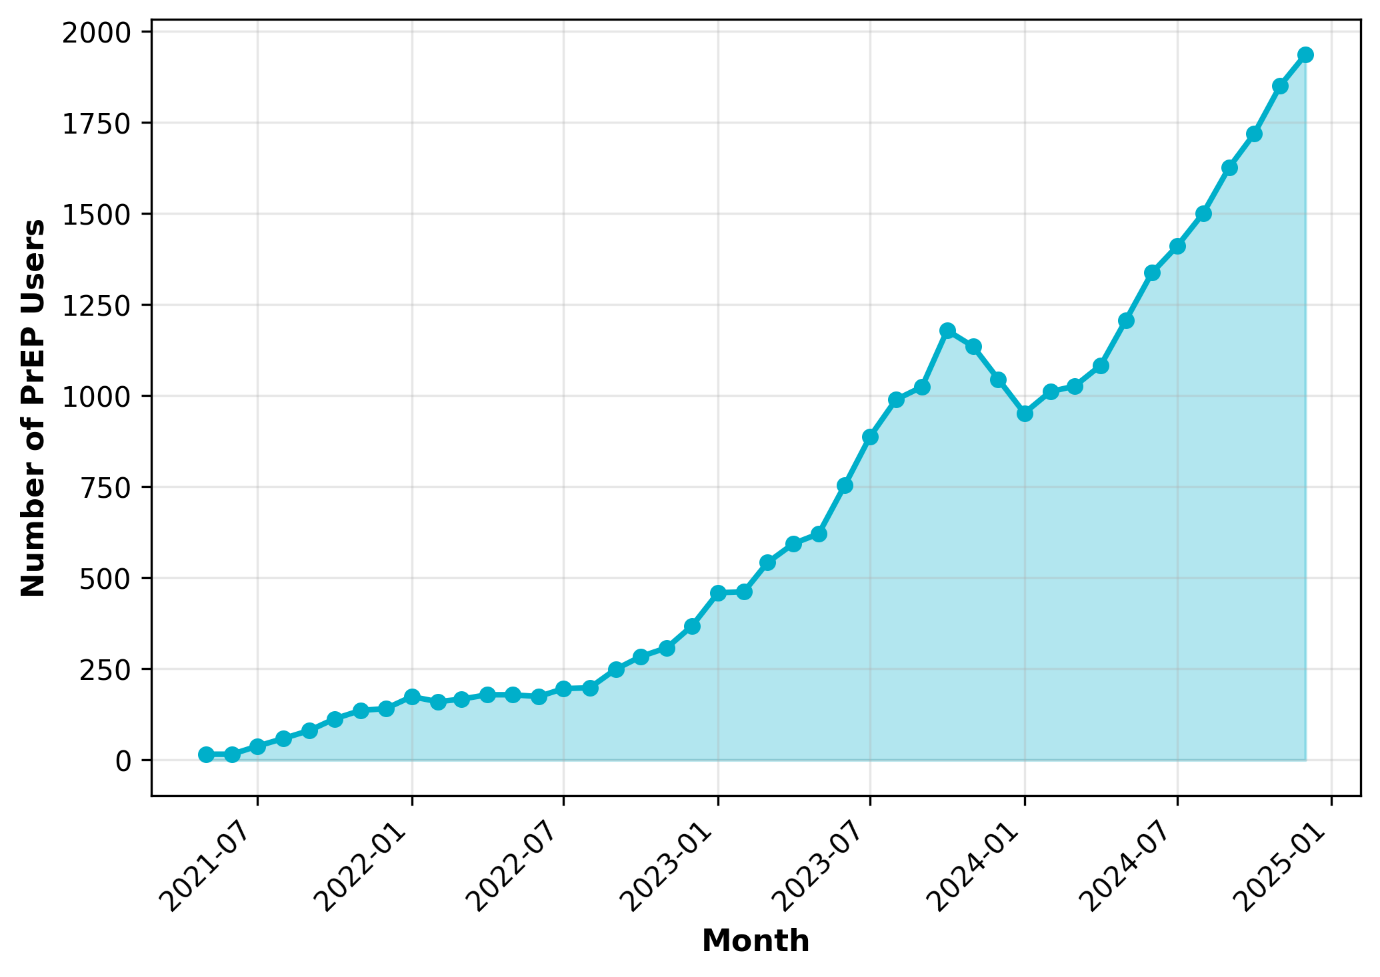


**Fig. S2.** Growth in PrEP users among GBMSM in Kazakhstan, May 2021–December 2024. *Note:* The graph shows cumulative current PrEP users over time, demonstrating sustained programme scale-up with a temporary plateau in 2023 followed by accelerated growth in 2024.

**Table S1:** Alternative Model Specifications

### **Part A: Model Coefficients**

| **Model Specification** | **Observations** | **β₀ (SE)** | **β₁ (SE)** | **β₂ (SE)** | **β₃ (SE)** |
| --- | --- | --- | --- | --- | --- |
| Primary Linear | 60 | 3.734 (0.611)*** | -0.047 (0.065) | -0.254 (0.750) | 0.037 (0.067) |
| Quadratic Time | 60 | 3.715 (0.622)*** | -0.039 (0.074) | -0.393 (0.753) | 0.070 (0.095) |
| Lag-Adjusted (3mo) | 57 | 3.734 (0.623)*** | -0.047 (0.067) | -0.345 (0.762) | 0.039 (0.069) |
| Testing Volume Control | 60 | 19.765 (1.799)*** | 0.053 (0.030)† | -0.056 (0.424) | -0.028 (0.029) |

### **Part B: Model Fit Statistics**

| **Model Specification** | **R²** | **Adjusted R²** | **AIC** | **Durbin-Watson** |
| --- | --- | --- | --- | --- |
| Primary Linear | 0.127 | 0.080 | 190.3 | 1.80 |
| Quadratic Time | 0.130 | 0.067 | 192.1 | 1.81 |
| Lag-Adjusted (3mo) | 0.130 | 0.080 | 183.1 | 1.75 |
| Testing Volume Control | **0.663** | **0.638** | **135.2** | 1.70 |

***Note:* SE = standard error. Significance: ***p<0.001; **p<0.01; *p<0.05; †p<0.10. All models estimated using ordinary least squares with Newey-West HAC robust standard errors. DW statistics between 1.7–2.0 indicate acceptable autocorrelation. Testing volume control model includes log(testing volume) as additional covariate, substantially improving fit (R² increases from 0.127 to 0.663) while intervention parameters maintain beneficial direction, indicating positivity reduction is not merely a testing artefact.**

**Table S2. Interrupted Time Series Analysis of Alternative Outcomes**

### **Part A: Descriptive Statistics**

| **Outcome Measure** | **Pre-PrEP Implementation** | **Post-PrEP Implementation** | **Absolute Change** | **Relative Change** |
| --- | --- | --- | --- | --- |
| Test Positivity Rate (%) | 3.38 ± 1.62 | 2.51 ± 0.87 | -0.87 pp | -25.7% |
| Diagnosis Rate (per 1,000 GBMSM) | 0.34 ± 0.09 | 0.51 ± 0.10 | +0.17 per 1,000 | +50.0% |
| Late Diagnosis Rate (%) | 15.65 ± 11.64 | 15.78 ± 7.83 | +0.13 pp | +0.8% |

*Note:* Values are mean ± standard deviation. Pre-PrEP: January 2020–April 2021 (n=16 months); Post-PrEP: May 2021–December 2024 (n=44 months). pp = percentage points.

### **Part B: ITS Model Results**

| **Outcome Measure** | **β₂ (Level Change)** | **95% CI** | **p-value** | **β₃ (Slope Change)** | **95% CI** | **p-value** | **R²** |
| --- | --- | --- | --- | --- | --- | --- | --- |
| Test Positivity Rate (%) | -0.254 | (-1.728, 1.220) | 0.761 | +0.037 | (-0.095, 0.169) | 0.598 | 0.127 |
| Diagnosis Rate (per 1,000) | +0.052 | (-0.017, 0.121) | 0.134 | -0.004 | (-0.009, 0.001) | 0.116 | 0.437 |
| Late Diagnosis Rate (%) | -8.418 | (-19.509, 2.673) | 0.134 | -0.710 | (-1.713, 0.293) | 0.163 | 0.057 |

*Note:* β₂ represents immediate level change at intervention; β₃ represents change in monthly slope. All models estimated using segmented regression with Newey-West robust standard errors.

### **Table S3: Power Analysis Details**

| **Parameter** | **Value** |
| --- | --- |
| Sample size (n) | 60 |
| Number of predictors | 3 |
| Alpha level | 0.05 |
| R² | 0.127 |
| Adjusted R² | 0.080 |
| Cohen's f² | 0.145 |
| Effect size category | Small |
| Achieved power | 66% |
| Required power | 80% |
| Power deficit | -14% |

*Note:* Cohen's f² calculated as R²/(1-R²). Effect size categories: small (0.02), medium (0.15), large (0.35). Counterfactual analysis achieved 95% power by testing cumulative effects across all 44 post-intervention months rather than decomposing into discrete parameters.
